# Supplementary material
Source: PubMed Central journal article supplement (PMC7798405)
Supplement: NIHMS1660305-supplement-Supporting_Information.pdf [file NIHMS1660305-supplement-Supporting_Information.pdf]

Supporting Information for:

# Capture and Release of Singlet Oxygen in Coordination-Driven Self-Assembled Organoplatinum(II) Metallacycles

Yan-Qin He,<sup>†,‡,⊥</sup> Werner Fudickar,<sup>§,⊥</sup> Jian-Hong Tang,<sup>\*,‡</sup> Heng Wang,<sup>//</sup> Xiaopeng Li,<sup>//</sup> Jun Han,<sup>†</sup> Zhengping Wang,<sup>†</sup> Min Liu,<sup>†</sup> Yu-Wu Zhong,<sup>#</sup> Torsten Linker,<sup>\*,§</sup> and Peter J. Stang<sup>\*,‡</sup>

<sup>†</sup>Institute of BioPharmaceutical Research, Liaocheng University, 1 Hunan Road, Liaocheng, Shandong 252000, China

<sup>‡</sup>Department of Chemistry, University of Utah, 315 South 1400 East, Room 2020, Salt Lake City, Utah 84112, United States

<sup>§</sup>Department of Chemistry, University of Potsdam, Karl-Liebknecht-Str. 24–25, 14476 Potsdam, Germany

<sup>//</sup>Department of Chemistry, University of South Florida, 4202 East Fowler Avenue, Tampa, Florida 33620, United States

<sup>#</sup>Key Laboratory of Photochemistry, Beijing National Laboratory for Molecular Sciences, CAS Research/Education Center for Excellence in Molecular Sciences, Institute of Chemistry, Chinese Academy of Sciences, Beijing 100190, China

<sup>⊥</sup>These authors contributed equally to this work

\*Email:

u6014248@utah.edu

linker@uni-potsdam.de

stang@chem.utah.edu

## Table of Contents

|                                                              |              |
|--------------------------------------------------------------|--------------|
| <b>1. Experimental Characterization Data</b>                 | <b>S2-S5</b> |
| <b>2. Photooxygenations monitored by UV/vis spectroscopy</b> | <b>S6</b>    |
| <b>3. Theoretical calculation results</b>                    | <b>S7-S9</b> |
| <b>4. Singlet oxygen trapping experiments</b>                | <b>S10</b>   |
| <b>5. ESI-TOF-MS Spectra</b>                                 | <b>S11</b>   |

## 1. Experimental Characterization Data

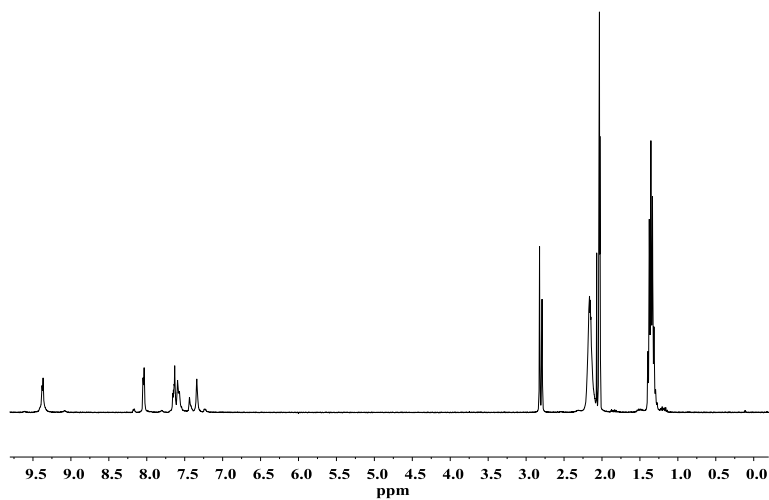

**Figure S1.**  $^1\text{H}$  NMR spectrum of **4** in Acetone- $\text{d}_6$  at 295 K.

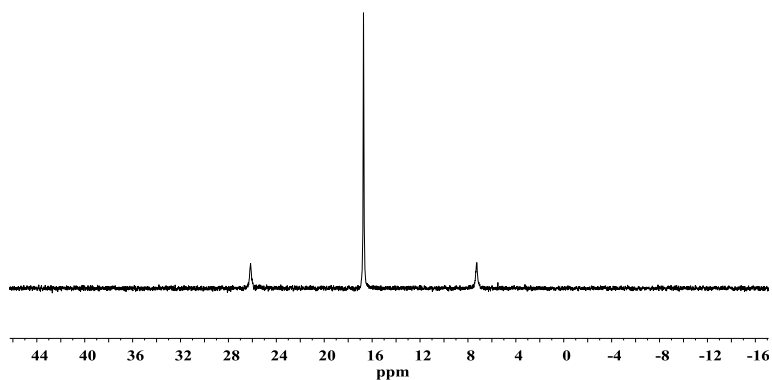

**Figure S2.**  $^{31}\text{P}\{^1\text{H}\}$  NMR spectrum of **4** in Acetone- $\text{d}_6$  at 295 K.

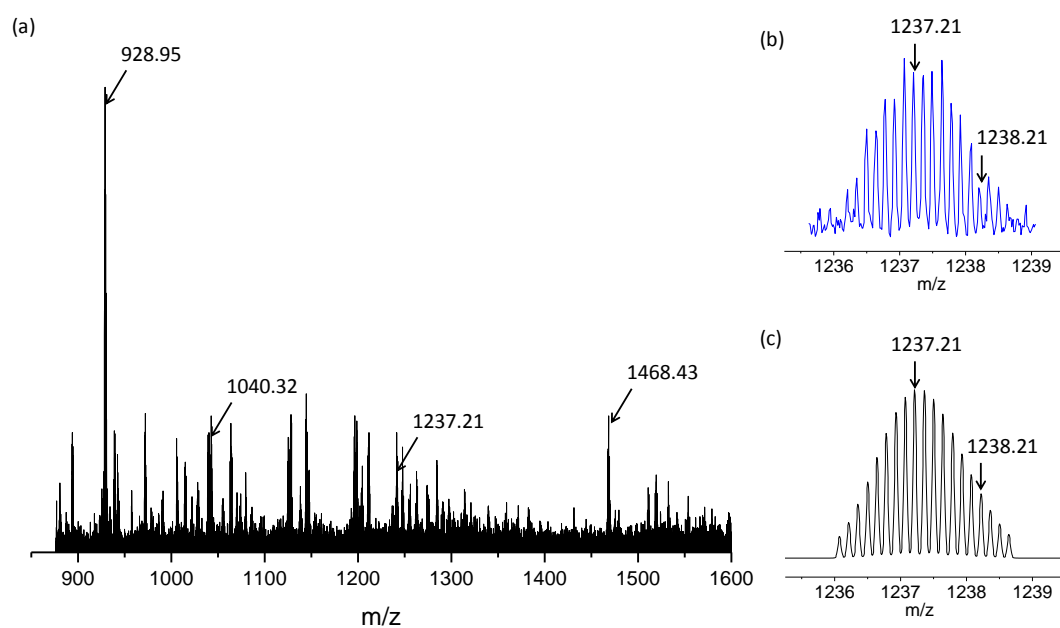

**Figure S3.** ESI-TOF-MS data for **4**. (a) ESI-TOF-MS full spectrum. (b) experimental data (upper, blue) and (c) predicted isotope distribution (below, black) of  $[\mathbf{M} - 7\text{OTf}]^{7+}$ .

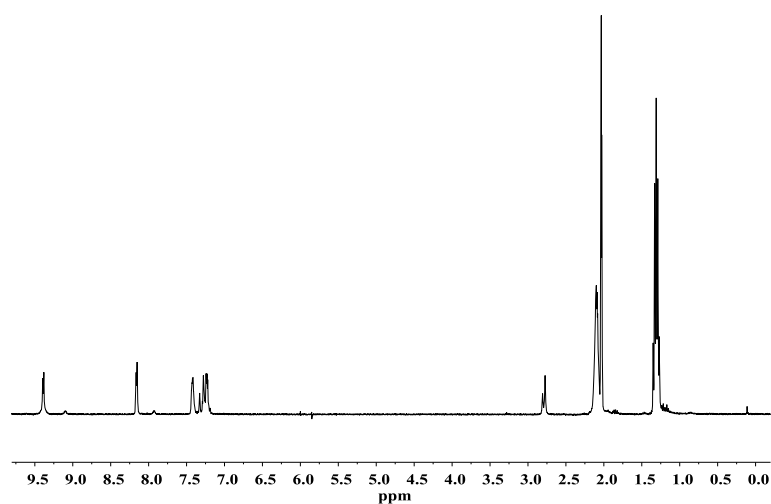

**Figure S4.** <sup>1</sup>H NMR spectrum of **5** in Acetone-*d*<sub>6</sub> at 295 K.

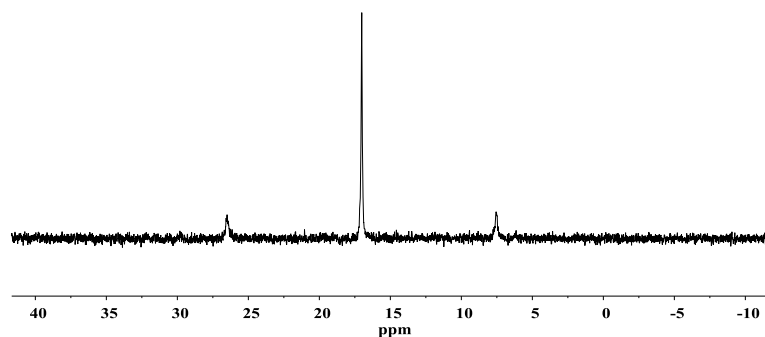

**Figure S5.**  $^{31}\text{P}\{^1\text{H}\}$  NMR spectrum of **5** in Acetone- $\text{d}_6$  at 295 K.

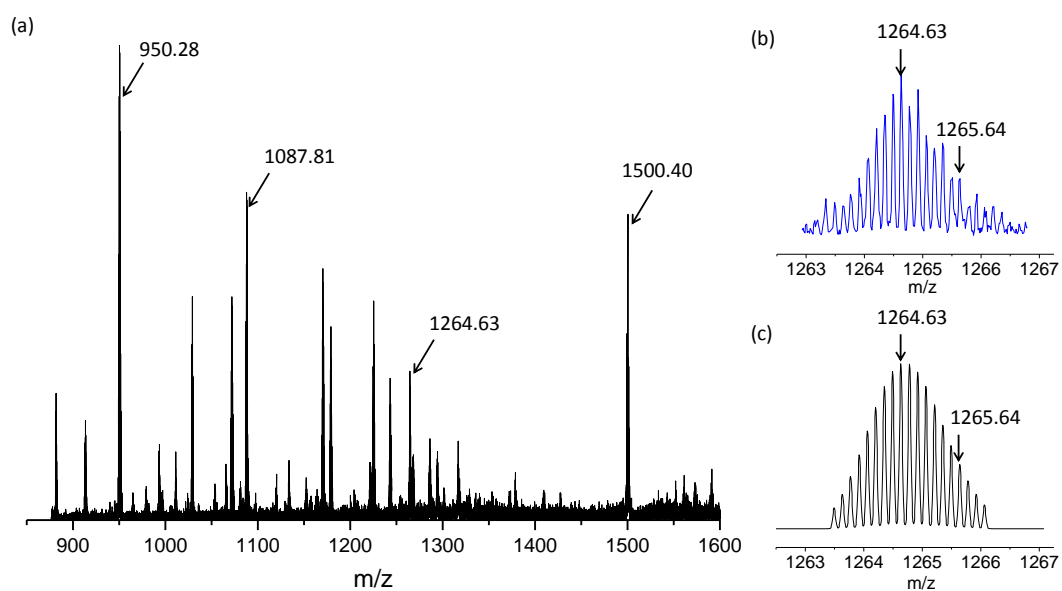

**Figure S6.** ESI-TOF-MS data for **5**. (a) ESI-TOF-MS full spectrum. (b) experimental data (upper, blue) and (c) predicted isotope distribution (below, black) of  $[\text{M} - 7\text{OTf}]^{7+}$ .

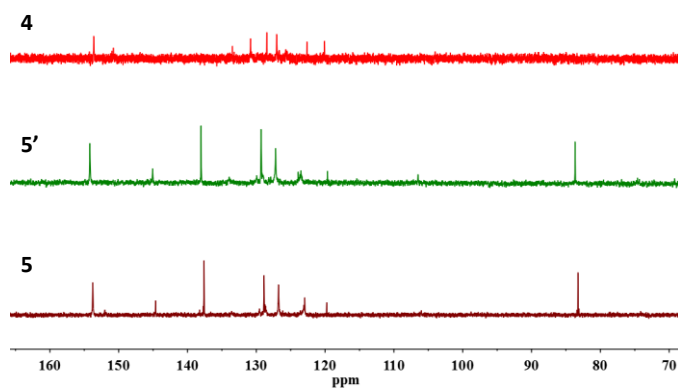

**Figure S7.** Partial  $^{13}\text{C}$  NMR (500 MHz, acetone- $\text{d}_6$ , 298 K) of complexes **4**, **5'**, **5**.

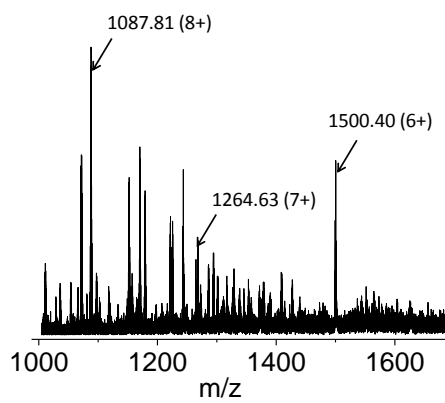

**Figure S8.** ESI-TOF-MS data for **5'**.

## 2. Photooxygenations monitored by UV/vis spectroscopy.

For the comparative study of the kinetics of complex **4**, ligand **1** and cationic species  $1\text{-Me}^{2+}$ , 10 mL of a mother-solution of methylene blue in  $\text{CD}_3\text{OD}$  was prepared, where an absorbance maximum at 660 nm was adjusted to  $\sim 0.8$ . This solution was then distributed over three quartz cuvettes, to which the three compounds were added from corresponding stock solutions. The concentration of all three compounds was  $5 \times 10^{-5} \text{ M}$ . After the first UV/vis spectra were recorded, each sample was irradiated with LED light (660 nm, 3 W per sample) and a spectrum measured thereafter. For the decay curves in the main text the  $\lambda_{\text{max}}$  values of 392 nm (**4**), 390 nm (**1**) and 395 nm ( $1\text{-Me}^{2+}$ ) were taken.

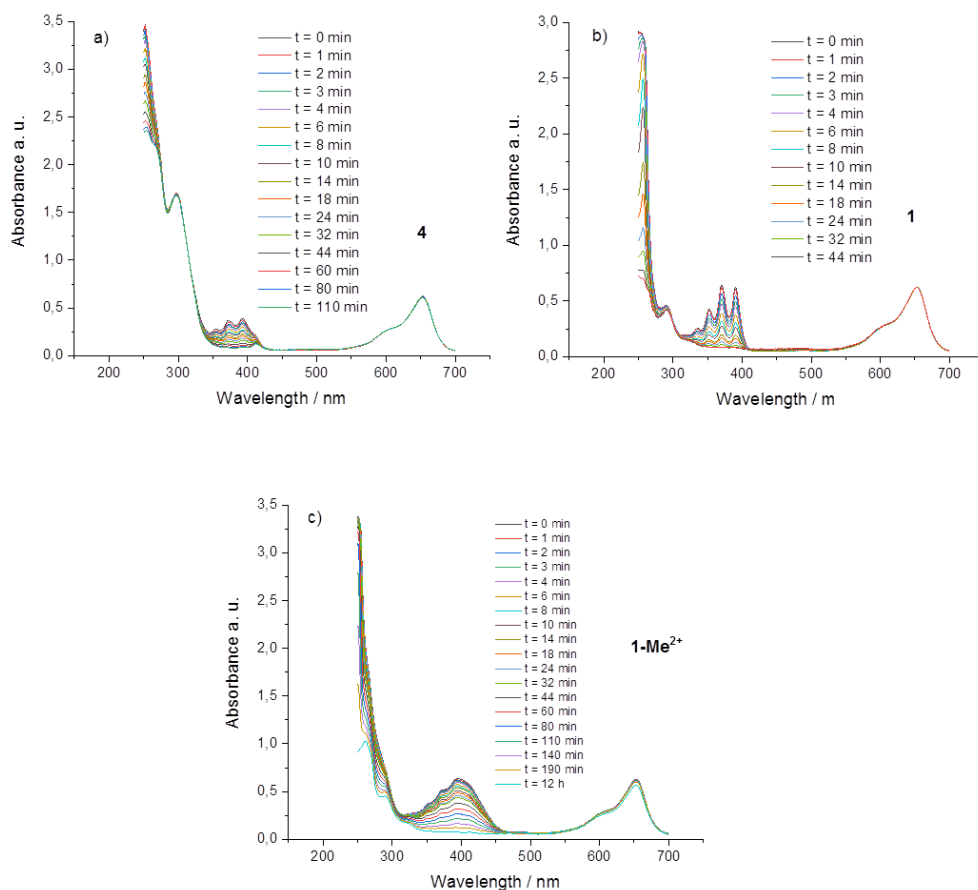

**Figure S9.** UV/vis absorbance spectra of solutions ( $5 \times 10^{-5} \text{ M}$ ) of a) complex **4**; b) ligand **1**; and c) the cationic species  $1\text{-Me}^{2+}$  in the presence of the sensitizer methylene blue ( $5 \times 10^{-6} \text{ M}$ ) in methanol- $\text{d}_4$  during irradiation.

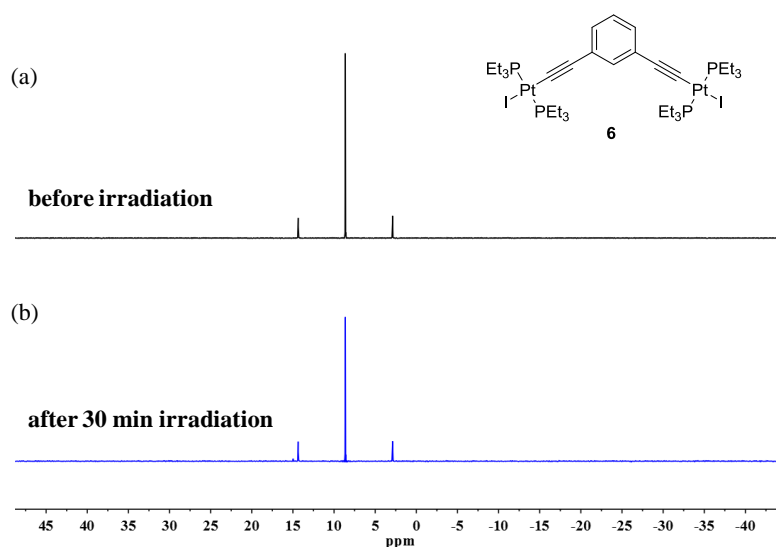

**Figure S10.**  $^{31}\text{P}\{^1\text{H}\}$  NMR spectrum of **6** in  $\text{CD}_2\text{Cl}_2$  at 295 K. (a) before irradiation, (b) after 30 min irradiation.

### 3. Theoretical calculation results

**Table S1.** TDDFT results of the ground state of complex **6** (transitions with  $f < 0.01$  are not shown).

| $S_n$ | $\lambda/\text{nm}$ | $f$   | transitions and their coefficients |
|-------|---------------------|-------|------------------------------------|
| 1     | 442                 | 0.082 | HOMO→LUMO (0.359)                  |
|       |                     |       | HOMO→LUMO+1 (0.504)                |
|       |                     |       | HOMO→LUMO+2 (0.339)                |
| 3     | 431                 | 0.037 | HOMO→LUMO (-0.318)                 |
|       |                     |       | HOMO→LUMO+1 (0.485)                |
|       |                     |       | HOMO→LUMO+2 (-0.389)               |
| 5     | 401                 | 0.033 | HOMO-1→LUMO (0.368)                |
|       |                     |       | HOMO-1→LUMO+1 (0.597)              |
| 9     | 383                 | 0.224 | HOMO-1→LUMO (0.592)                |
|       |                     |       | HOMO-1→LUMO+1 (-0.371)             |

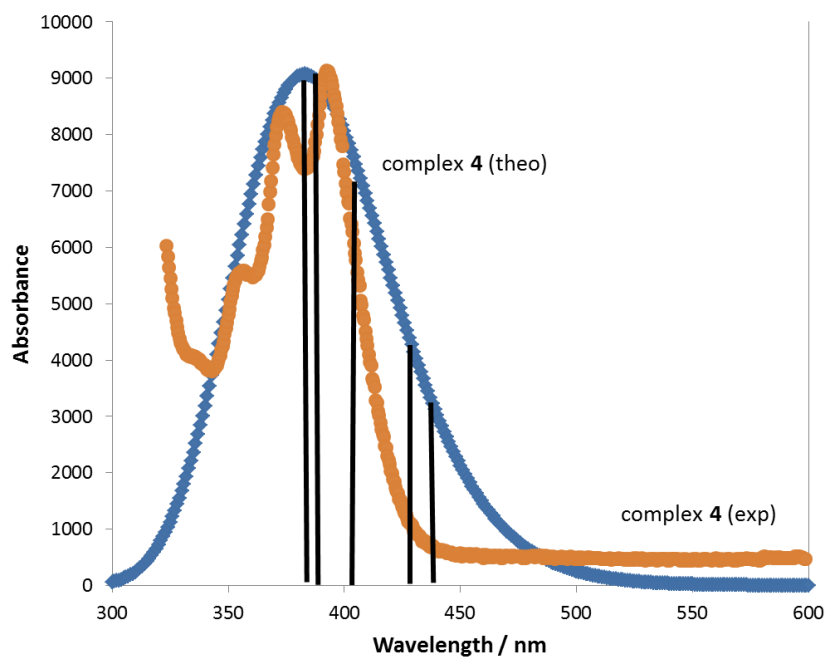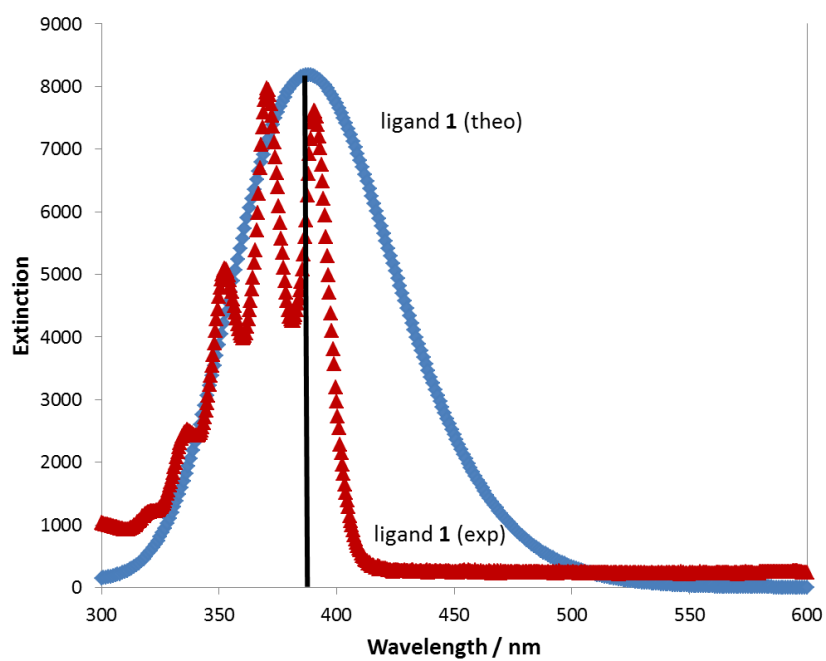

**Figure S11.** Theoretical and experimental UV/vis spectra of the ligand 1 and the complexes 5 and 6.



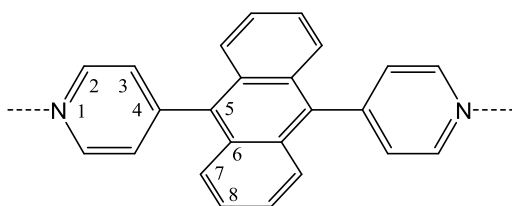

|    | <b>1</b> | <b>6</b> | <b>1-Me<sup>2+</sup></b> |
|----|----------|----------|--------------------------|
| N1 | -0.405   | -0.448   | -0.364                   |
| C2 | 0.181    | 0.268    | 0.355                    |
| C3 | -0.009   | 0.034    | 0.042                    |
| C4 | 0.018    | 0.014    | 0.049                    |
| C5 | -0.070   | -0.076   | -0.057                   |
| C6 | 0.106    | 0.121    | 0.119                    |
| C7 | -0.051   | -0.064   | -0.058                   |
| C8 | 0.001    | 0.031    | 0.058                    |

**Figure S12.** Mulliken charge populations ( $Q/e$ ) of the ligand **1**, complex **6** and the cationic species **1-Me<sup>2+</sup>**.

#### 4. Singlet oxygen trapping experiments

To determine the amount of  $^1\text{O}_2$ , three trapping experiments with the trap DPBF were performed. For each run the EPO was mixed with the trap in a 10 mL glass flask and dissolved in 2 mL toluene- $d_8$ . From each solution an aliquot of 50  $\mu\text{L}$  was taken, diluted to 4 mL and the DPBF absorbance at 416 nm was measured giving  $A_{416_{\text{before}}}$ . The solutions were subjected to three cycles of freeze-pump-and-thaw in order to remove atmospheric oxygen and then sealed with a stopper. The flasks were kept overnight at a temperature of 100  $^\circ\text{C}$ . The solutions were transferred to a flask and diluted to 5 mL, then 125  $\mu\text{L}$  were taken and diluted to 4 mL to measure the DPBF absorbance giving  $A_{416_{\text{after}}}$ . The difference between the absorbances of these two spectra allows to calculate the amount of DPBF, which reacted with  $^1\text{O}_2$ :

$$n(\text{DPBF}_{\text{oxidized}}) = (A_{416_{\text{before}}} - A_{416_{\text{after}}}) / A_{416_{\text{before}}} * n(\text{DPBF}_{\text{total}})$$

The percentage of  $^1\text{O}_2$  generated per EPO gives :  $\phi(^1\text{O}_2) = n(\text{DPBF}_{\text{oxidized}}) / n(\text{EPO})$ .

Note that  $n(\text{EPO}) = 1/6 n(5)$

The results are summarized in Table S2:

Table S2. Summary of the results of the transfer experiments using the trap DBPF

| run | $n(\text{EPO})/\text{mol}$ | $n(\text{DPBF}_{\text{total}})/\text{mol}$ | $n(\text{DPBF}_{\text{oxidized}})$ | $\phi(^1\text{O}_2)$ |
|-----|----------------------------|--------------------------------------------|------------------------------------|----------------------|
| 1   | $1.99 \times 10^{-6}$      | $1.03 \times 10^{-5}$                      | $5.58 \times 10^{-7}$              | 0.28                 |
| 2   | $3.85 \times 10^{-6}$      | $8.8 \times 10^{-6}$                       | $1.08 \times 10^{-6}$              | 0.28                 |
| 3   | $6.22 \times 10^{-6}$      | $8.9 \times 10^{-6}$                       | $1.64 \times 10^{-6}$              | 0.27                 |

## 5. ESI-TOF-MS Spectra

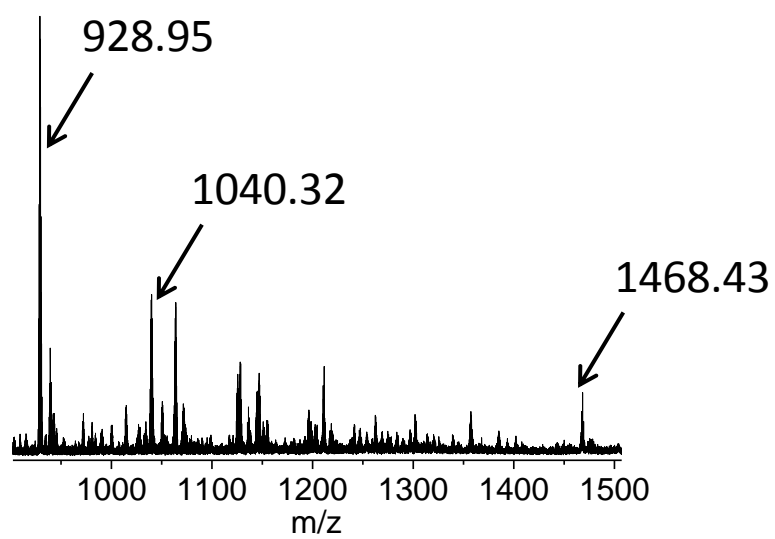

**Figure S13.** ESI-TOF-MS data for 4'.
